# Supplementary material for: Integrating the analysis of transcriptome-wide association study and gene expression profile to identify genes associated with spondyloarthritis
Source: Research Square preprint supplement (doi:10.21203/rs.3.rs-936677/v1), 2021-10-26
Supplement: Supplementary file 1 [file 2994796fc0798f329821394b.docx]

| Number | Category | Description | Count | Log10(P) |
| --- | --- | --- | --- | --- |
| GO:0007005 | GO Biological Processes | mitochondrion organization | 22 | -4.29 |
| GO:0007005 | GO Biological Processes | mitochondrion organization | 22 | -4.29 |
| GO:0006091 | GO Biological Processes | generation of precursor metabolites and energy | 21 | -4.29 |
| GO:0006091 | GO Biological Processes | generation of precursor metabolites and energy | 21 | -4.29 |
| GO:0043985 | GO Biological Processes | histone H4-R3 methylation | 3 | -4.16 |
| GO:0043985 | GO Biological Processes | histone H4-R3 methylation | 3 | -4.16 |
| GO:0042426 | GO Biological Processes | choline catabolic process | 3 | -4.16 |
| GO:0042426 | GO Biological Processes | choline catabolic process | 3 | -4.16 |
| GO:0042158 | GO Biological Processes | lipoprotein biosynthetic process | 8 | -3.99 |
| GO:0042158 | GO Biological Processes | lipoprotein biosynthetic process | 8 | -3.99 |
| GO:0031400 | GO Biological Processes | negative regulation of protein modification process | 23 | -3.87 |
| GO:0031400 | GO Biological Processes | negative regulation of protein modification process | 23 | -3.87 |
| GO:0006577 | GO Biological Processes | amino-acid betaine metabolic process | 4 | -3.85 |
| GO:0045333 | GO Biological Processes | cellular respiration | 11 | -3.80 |
| GO:0042402 | GO Biological Processes | cellular biogenic amine catabolic process | 4 | -3.66 |
| GO:0042157 | GO Biological Processes | lipoprotein metabolic process | 9 | -3.65 |
| GO:0032042 | GO Biological Processes | mitochondrial DNA metabolic process | 4 | -3.57 |
| GO:0032042 | GO Biological Processes | mitochondrial DNA metabolic process | 4 | -3.57 |
| GO:0019695 | GO Biological Processes | choline metabolic process | 3 | -3.55 |
| GO:0009310 | GO Biological Processes | amine catabolic process | 4 | -3.49 |
| GO:0045088 | GO Biological Processes | regulation of innate immune response | 18 | -3.40 |
| GO:0045088 | GO Biological Processes | regulation of innate immune response | 18 | -3.40 |
| GO:0062012 | GO Biological Processes | regulation of small molecule metabolic process | 18 | -3.39 |
| GO:0055114 | GO Biological Processes | oxidation-reduction process | 19 | -3.39 |
| GO:0006497 | GO Biological Processes | protein lipidation | 7 | -3.32 |
| GO:0034969 | GO Biological Processes | histone arginine methylation | 3 | -3.27 |
| GO:0002831 | GO Biological Processes | regulation of response to biotic stimulus | 9 | -3.23 |
| GO:0002831 | GO Biological Processes | regulation of response to biotic stimulus | 9 | -3.23 |
| GO:0018195 | GO Biological Processes | peptidyl-arginine modification | 4 | -3.14 |
| GO:1903829 | GO Biological Processes | positive regulation of cellular protein localization | 14 | -3.06 |
| GO:1903829 | GO Biological Processes | positive regulation of cellular protein localization | 14 | -3.06 |
| GO:0006264 | GO Biological Processes | mitochondrial DNA replication | 3 | -3.04 |
| GO:0007568 | GO Biological Processes | aging | 13 | -3.03 |
| GO:0007568 | GO Biological Processes | aging | 13 | -3.03 |
| GO:0000002 | GO Biological Processes | mitochondrial genome maintenance | 4 | -3.02 |
| GO:0019216 | GO Biological Processes | regulation of lipid metabolic process | 16 | -2.98 |
| GO:0019216 | GO Biological Processes | regulation of lipid metabolic process | 16 | -2.98 |
| GO:0140053 | GO Biological Processes | mitochondrial gene expression | 9 | -2.97 |
| GO:0140053 | GO Biological Processes | mitochondrial gene expression | 9 | -2.97 |
| GO:0032210 | GO Biological Processes | regulation of telomere maintenance via telomerase | 5 | -2.92 |
| GO:0032210 | GO Biological Processes | regulation of telomere maintenance via telomerase | 5 | -2.92 |
| GO:0002230 | GO Biological Processes | positive regulation of defense response to virus by host | 4 | -2.91 |
| GO:0009066 | GO Biological Processes | aspartate family amino acid metabolic process | 5 | -2.88 |
| GO:0015980 | GO Biological Processes | energy derivation by oxidation of organic compounds | 12 | -2.88 |
| GO:0018216 | GO Biological Processes | peptidyl-arginine methylation | 3 | -2.85 |
| GO:0050688 | GO Biological Processes | regulation of defense response to virus | 6 | -2.84 |
| GO:0032212 | GO Biological Processes | positive regulation of telomere maintenance via telomerase | 4 | -2.80 |
| GO:0022900 | GO Biological Processes | electron transport chain | 9 | -2.74 |
| GO:0006576 | GO Biological Processes | cellular biogenic amine metabolic process | 5 | -2.67 |
| GO:1904358 | GO Biological Processes | positive regulation of telomere maintenance via telomere lengthening | 4 | -2.66 |
| GO:1904356 | GO Biological Processes | regulation of telomere maintenance via telomere lengthening | 5 | -2.64 |
| GO:0090181 | GO Biological Processes | regulation of cholesterol metabolic process | 5 | -2.58 |
| GO:0060333 | GO Biological Processes | interferon-gamma-mediated signaling pathway | 6 | -2.55 |
| GO:0042135 | GO Biological Processes | neurotransmitter catabolic process | 3 | -2.54 |
| GO:0043467 | GO Biological Processes | regulation of generation of precursor metabolites and energy | 8 | -2.47 |
| GO:1905477 | GO Biological Processes | positive regulation of protein localization to membrane | 7 | -2.45 |
| GO:0050691 | GO Biological Processes | regulation of defense response to virus by host | 4 | -2.45 |
| GO:0071897 | GO Biological Processes | DNA biosynthetic process | 9 | -2.43 |
| GO:2000573 | GO Biological Processes | positive regulation of DNA biosynthetic process | 5 | -2.43 |
| GO:0009067 | GO Biological Processes | aspartate family amino acid biosynthetic process | 3 | -2.41 |
| GO:0007004 | GO Biological Processes | telomere maintenance via telomerase | 5 | -2.41 |
| GO:0009117 | GO Biological Processes | nucleotide metabolic process | 21 | -2.35 |
| GO:0006520 | GO Biological Processes | cellular amino acid metabolic process | 13 | -2.34 |
| GO:0010517 | GO Biological Processes | regulation of phospholipase activity | 5 | -2.32 |
| GO:0006479 | GO Biological Processes | protein methylation | 8 | -2.31 |
| GO:0008213 | GO Biological Processes | protein alkylation | 8 | -2.31 |
| GO:0009068 | GO Biological Processes | aspartate family amino acid catabolic process | 3 | -2.30 |
| GO:0006753 | GO Biological Processes | nucleoside phosphate metabolic process | 21 | -2.29 |
| GO:0000959 | GO Biological Processes | mitochondrial RNA metabolic process | 4 | -2.24 |
| GO:0045936 | GO Biological Processes | negative regulation of phosphate metabolic process | 18 | -2.24 |
| GO:0010563 | GO Biological Processes | negative regulation of phosphorus metabolic process | 18 | -2.23 |
| GO:0006278 | GO Biological Processes | RNA-dependent DNA biosynthetic process | 5 | -2.22 |
| GO:0070129 | GO Biological Processes | regulation of mitochondrial translation | 3 | -2.19 |

| GO:0051348 | GO Biological Processes | negative regulation of transferase activity | 11 | -2.16 |
| --- | --- | --- | --- | --- |
| GO:0006720 | GO Biological Processes | isoprenoid metabolic process | 7 | -2.16 |
| GO:0051607 | GO Biological Processes | defense response to virus | 10 | -2.14 |
| GO:2000278 | GO Biological Processes | regulation of DNA biosynthetic process | 6 | -2.13 |
| GO:0090398 | GO Biological Processes | cellular senescence | 5 | -2.13 |
| GO:0032204 | GO Biological Processes | regulation of telomere maintenance | 5 | -2.13 |
| GO:1902532 | GO Biological Processes | negative regulation of intracellular signal transduction | 17 | -2.12 |
| GO:0097164 | GO Biological Processes | ammonium ion metabolic process | 9 | -2.12 |
| GO:0032206 | GO Biological Processes | positive regulation of telomere maintenance | 4 | -2.11 |
| GO:0010833 | GO Biological Processes | telomere maintenance via telomere lengthening | 5 | -2.11 |
| GO:0009065 | GO Biological Processes | glutamine family amino acid catabolic process | 3 | -2.10 |
| GO:0042326 | GO Biological Processes | negative regulation of phosphorylation | 15 | -2.09 |
| GO:0001933 | GO Biological Processes | negative regulation of protein phosphorylation | 14 | -2.06 |
| GO:0051052 | GO Biological Processes | regulation of DNA metabolic process | 14 | -2.06 |
| GO:0008203 | GO Biological Processes | cholesterol metabolic process | 7 | -2.06 |
| GO:0007569 | GO Biological Processes | cell aging | 6 | -2.06 |
| GO:0006140 | GO Biological Processes | regulation of nucleotide metabolic process | 7 | -2.05 |
| GO:1901605 | GO Biological Processes | alpha-amino acid metabolic process | 9 | -2.03 |
| GO:0010586 | GO Biological Processes | miRNA metabolic process | 3 | -2.01 |
| GO:1902652 | GO Biological Processes | secondary alcohol metabolic process | 7 | -2.00 |
